# Supplementary material for: Association between Regional Body Muscle Mass and Non-Alcoholic Fatty Liver Disease: An Observational Study Using Data from the REACTION Study
Source: MDPI journal article supplement (doi:10.3390/jpm13020209), 2023-01-25
Supplement: s1 [file s1]

Supplemental Table S1. Association of NAFLD and deficiency of muscle strength.

|                                   |     | <b>Model 1</b>     | <b>P</b> | <b>Model 2</b>     | <b>P</b> | <b>Model 3</b>     | <b>P</b> |
|-----------------------------------|-----|--------------------|----------|--------------------|----------|--------------------|----------|
|                                   |     | <b>OR(95%CI)</b>   |          | <b>OR(95%CI)</b>   |          | <b>OR(95%CI)</b>   |          |
| Deficiency of body strength       | No  | 1.0                |          | 1.0                |          | 1.0                |          |
|                                   | Yes | 5.098(4.115-6.317) | 0.000    | 2.549(2.000-3.248) | 0.000    | 2.286(1.762-2.965) | 0.000    |
| Deficiency of lower limb strength | No  | 1.0                |          | 1.0                |          | 1.0                |          |
|                                   | Yes | 6.757(4.976-9.175) | 0.000    | 3.048(2.183-4.225) | 0.000    | 2.546(1.791-3.621) | 0.000    |
| Deficiency of upper limb strength | No  | 1.0                |          | 1.0                |          | 1.0                |          |
|                                   | Yes | 1.917(0.974-3.773) | 0.000    | 2.176(0.965-4.907) | 0.061    | 1.404(0.492-4.002) | 0.526    |

Model 1: adjusted for age and sex. Model 2: Model 1 + smoking, exercise, hypertension, diabetes and WC. Model 3: Model 2 + TG, TC, LDL, HDL, ALT and IR. Abbreviations: NAFLD, nonalcoholic fatty liver disease; OR, odds ratio; CI, confidence interval; WC, waist circumference; TG, triglycerides; TC, total cholesterol; LDL-C, low-density lipoprotein cholesterol; HDL-C, high-density lipoprotein cholesterol; ALT, alanine aminotransferase; HOMA-IR, homeostasis model assessment of insulin resistance.
